# Supplementary material for: Dielectric phase transition of an A2BX4-type perovskite with a pentahedral to octahedral transformation
Source: Royal Society of Chemistry journal article supplement (doi:10.1039/c9dt04270a), 2020-01-01
Supplement: c9dt04270a1.pdf [file c9dt04270a1.pdf]

**Electronic Supplementary Information (ESI) for**  
**Dielectric Phase Transition of an  $A_2BX_4$ -Type**  
**Perovskite with a Pentahedral to Octahedron**  
**Transformation**

Siqian Chai,<sup>a</sup> Jianbo Xiong,<sup>b</sup> Yongshen Zheng,<sup>b</sup> Rongchao Shi,<sup>b</sup> Jialiang Xu<sup>\*a,b</sup>

<sup>1</sup> School of Chemical Engineering and Technology, Tianjin University, Tianjin  
300350, China

<sup>2</sup> School of Materials Science and Engineering, Nankai University, Tianjin  
300350, China

<sup>a</sup>) Author to whom correspondence should be addressed:

[jjaliang.xu@nankai.edu.cn](mailto:jjaliang.xu@nankai.edu.cn)

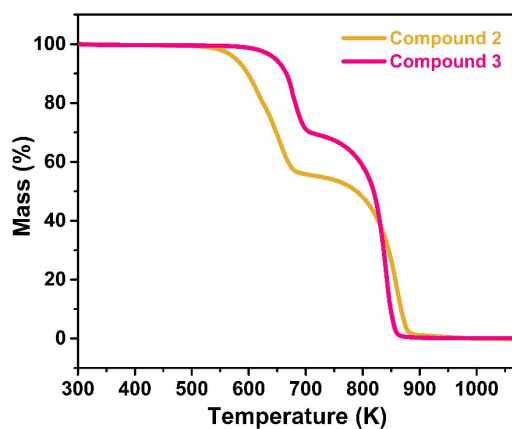

Fig. S1 TGA analyses of Compounds 2 (yellow line) and 3 (purple line).

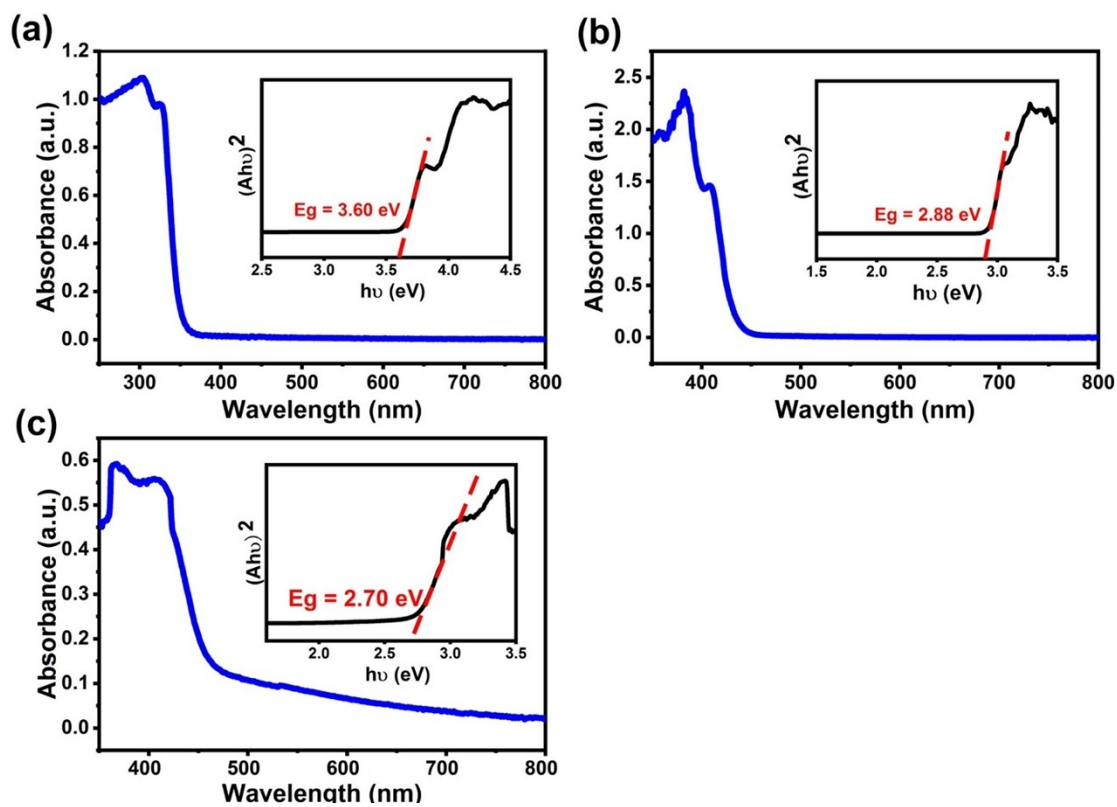

Fig. S2 UV-vis spectra of compounds 1 (a), 2 (b) and 3 (c). Insets: Calculated band gaps of 1 (a), 2 (b) and 3 (c).

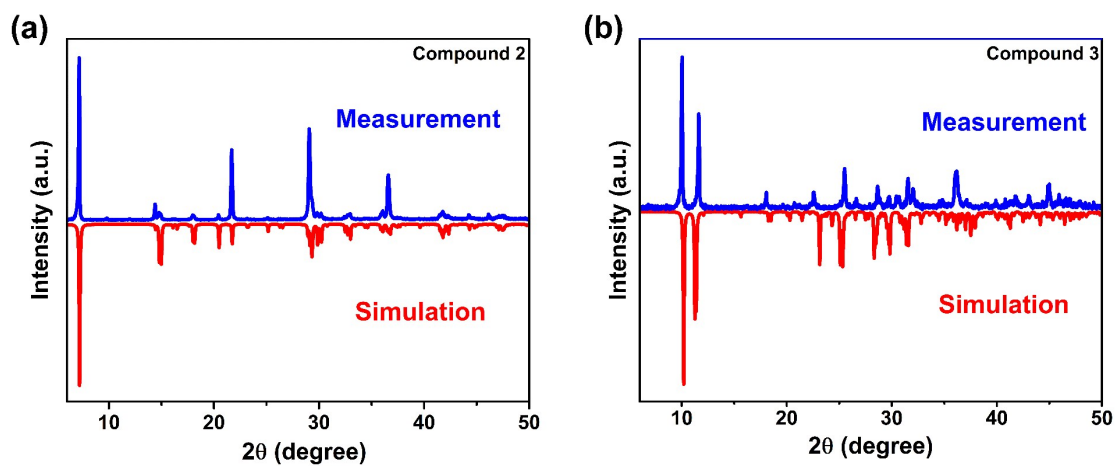

**Fig. S3** Experimental and simulated powder X-ray diffraction patterns of compounds 2 (a) and 3 (b).

**Table S1** Crystal data and structure refinements for **1**, **2** and **3**.

| Empirical formula<br>(CCDC number)          | [C <sub>5</sub> H <sub>12</sub> N] <sub>2</sub> PbCl <sub>4</sub><br>(1) (1962915) | [C <sub>5</sub> H <sub>12</sub> N] <sub>2</sub> PbCl <sub>4</sub><br>(1) (1962913) | [C <sub>5</sub> H <sub>12</sub> N] <sub>2</sub> PbBr <sub>4</sub><br>(2) (1962914) | [C <sub>5</sub> H <sub>12</sub> N]PbI <sub>3</sub> (3)<br>(1962916) |
|---------------------------------------------|------------------------------------------------------------------------------------|------------------------------------------------------------------------------------|------------------------------------------------------------------------------------|---------------------------------------------------------------------|
| Temperature                                 | 120 K                                                                              | 373 K                                                                              | 210 K                                                                              | 150 K                                                               |
| Formula weight                              | 1042.60                                                                            | 521.30                                                                             | 699.14                                                                             | 674.05                                                              |
| Crystal system                              | Orthorhombic                                                                       | Monoclinic                                                                         | Orthorhombic                                                                       | Monoclinic                                                          |
| Space group                                 | Pnma                                                                               | C2/c                                                                               | Pnma                                                                               | P21/c                                                               |
| a (Å)                                       | 22.4936(8)                                                                         | 25.0243(15)                                                                        | 12.15(5)                                                                           | 19.3160(19)                                                         |
| b (Å)                                       | 23.8631(10)                                                                        | 6.0344(3)                                                                          | 24.90(7)                                                                           | 8.2729(8)                                                           |
| c (Å)                                       | 6.1802(2)                                                                          | 11.7615(6)                                                                         | 6.200(10)                                                                          | 17.4841(17)                                                         |
| α (deg.)                                    | 90                                                                                 | 90                                                                                 | 90                                                                                 | 90                                                                  |
| β (deg.)                                    | 90                                                                                 | 104.112(5)                                                                         | 90                                                                                 | 116.121(3)                                                          |
| γ (deg.)                                    | 90                                                                                 | 90                                                                                 | 90                                                                                 | 90                                                                  |
| Volume (Å <sup>3</sup> ), Z                 | 3317.3(2), 4                                                                       | 1722.46(17), 4                                                                     | 1875(9), 4                                                                         | 2508.6(4), 8                                                        |
| Calculated<br>density (Mg/ m <sup>3</sup> ) | 2.088                                                                              | 2.010                                                                              | 2.476                                                                              | 3.569                                                               |
| F(000)                                      | 1984                                                                               | 992                                                                                | 1280                                                                               | 2320                                                                |
| Limiting indices                            | -31<=h<=30<br>-32<=k<=33<br>-8<=l<=8                                               | -30<=h<=30<br>-7<=k<=7<br>-14<=l<=14                                               | 0<=h<=14<br>-28<=k<=28<br>0<=l<=7                                                  | -23<=h<=21<br>-9<=k<=10<br>-21<=l<=21                               |
| Collected<br>reflections                    | 31870                                                                              | 7651                                                                               | 1531                                                                               | 17269                                                               |
| Unique<br>reflections                       | 4528 [R <sub>(int)</sub> =<br>0.0519]                                              | 1690 [R <sub>(int)</sub> =<br>0.1733]                                              | 1531                                                                               | 4674 [R <sub>(int)</sub> =<br>0.0969]                               |
| Completeness                                | 99.8%                                                                              | 99.9%                                                                              | 97.3%                                                                              | 98.2%                                                               |
| Data / restraints /<br>parameters           | 4528/54/163                                                                        | 1690/276/137                                                                       | 1531/288/137                                                                       | 4674/144/182                                                        |
| GOF                                         | 1.031                                                                              | 1.026                                                                              | 1.071                                                                              | 1.038                                                               |
| R <sub>1</sub> /wR <sub>2</sub> [I>2σ(I)]   | 0.0233/0.0560                                                                      | 0.0954/0.2400                                                                      | 0.1272/0.3062                                                                      | 0.1071/0.3232                                                       |

**Table S2** Hydrogen-Bond Geometry (Å, degree) for N–H···Cl interactions at 295 and 373 K in **1**.

|       | D–H···A        | H···A [Å] | D···A [Å] | D–H···A [°] |
|-------|----------------|-----------|-----------|-------------|
| 295 K | N4–H4B···Cl6   | 2.91      | 3.34(8)   | 111.5       |
|       | N6–H6B···Cl1   | 2.99      | 3.37(9)   | 107.7       |
|       | N6–H6B···Cl3   | 2.89      | 3.40(8)   | 118.2       |
| 373 K | N1'–H1'2···Cl3 | 2.79      | 3.50(4)   | 138.0       |
|       | N1'–H1'2···Cl2 | 2.98      | 3.61(4)   | 130.1       |
|       | N1–H1B···Cl3   | 2.81      | 3.47(8)   | 131.8       |

**Table S3** Selected bond lengths [Å] and angles [°] for **1** at 295 and 373 K.

|       |                                          |            |                                            |             |
|-------|------------------------------------------|------------|--------------------------------------------|-------------|
| 295 K | Pb0A-Cl1                                 | 2.6763(11) | Pb1A-Cl5 <sup>ii</sup>                     | 2.8657(8)   |
|       | Pb0A-Cl6 <sup>i</sup>                    | 2.9095(10) | Pb1A-Cl5                                   | 2.8658(8)   |
|       | Pb0A-Cl3                                 | 2.7851(10) | Pb1A-Cl4                                   | 2.6289(11)  |
|       | Pb0A-Cl2                                 | 2.8814(8)  | Pb1A-Cl6                                   | 2.8166(10)  |
|       | Pb0A-Cl2 <sup>ii</sup>                   | 2.8815(8)  | Pb1A-Cl3                                   | 2.9418(10)  |
|       | Cl1-Pb0A-Cl6 <sup>i</sup>                | 93.13(3)   | Cl5 <sup>ii</sup> -Pb1A-Cl3                | 95.395(15)  |
|       | Cl1-Pb0A-Cl3                             | 88.53(3)   | Cl5-Pb1A-Cl3                               | 95.396(15)  |
|       | Cl1-Pb0A-Cl2 <sup>ii</sup>               | 82.516(16) | Cl4-Pb1A-Cl5                               | 86.717(16)  |
|       | Cl1-Pb0A-Cl2                             | 82.517(16) | Cl4-Pb1A-Cl5 <sup>ii</sup>                 | 86.717(16)  |
|       | Cl3-Pb0A-Cl6 <sup>i</sup>                | 178.34(3)  | Cl4-Pb1A-Cl6                               | 89.57(3)    |
|       | Cl3-Pb0A-Cl2                             | 89.055(14) | Cl4-Pb1A-Cl3                               | 88.68(3)    |
|       | Cl3-Pb0A-Cl2 <sup>ii</sup>               | 89.053(14) | Cl6-Pb1A-Cl5 <sup>ii</sup>                 | 84.503(15)  |
|       | Cl2 <sup>ii</sup> -Pb0A-Cl6 <sup>i</sup> | 91.163(14) | Cl6-Pb1A-Cl5                               | 84.502(15)  |
|       | Cl2-Pb0A-Cl6 <sup>i</sup>                | 91.161(14) | Cl6-Pb1A-Cl3                               | 178.25(3)   |
|       | Cl2-Pb0A-Cl2 <sup>ii</sup>               | 164.96(3)  | Pb1A-Cl6-Pb0A                              | 163.31(4)   |
|       | Cl5 <sup>ii</sup> -Pb1A-Cl5              | 167.23(3)  | Pb0A-Cl3-Pb1A                              | 167.76(4)   |
| 373 K | Pb1-Cl1                                  | 2.730(10)  | Pb1-Cl2                                    | 2.95754(16) |
|       | Pb1-Cl3 <sup>iii</sup>                   | 2.851(7)   | Pb1-Cl2 <sup>iii</sup>                     | 2.95754(16) |
|       | Pb1-Cl3                                  | 2.851(7)   |                                            |             |
|       | Cl1-Pb1-Cl3 <sup>iii</sup>               | 84.73(15)  | Cl1-Pb1-Cl2 <sup>iii</sup>                 | 96.178(9)   |
|       | Cl1-Pb1-Cl3                              | 84.73(15)  | Cl3 <sup>iii</sup> -Pb1-Cl2 <sup>iii</sup> | 90.22(17)   |
|       | Cl3 <sup>iii</sup> -Pb1-Cl3              | 169.5(3)   | Cl3-Pb1-Cl2 <sup>iii</sup>                 | 90.91(17)   |
|       | Cl1-Pb1-Cl2                              | 96.178(9)  | Cl2-Pb1-Cl2 <sup>iii</sup>                 | 167.644(18) |
|       | Cl3 <sup>iii</sup> -Pb1-Cl2              | 90.91(17)  | Pb1 <sup>v</sup> -Cl2-Pb1                  | 180.0       |
|       | Cl3-Pb1-Cl2                              | 90.22(17)  |                                            |             |

Symmetry code: (i)  $x-1/2, y, -z+1/2$ ; (ii)  $x, -y+3/2, z$ ; (iii)  $-x+1, y, -z+1/2$ ; (v)  $-x+1, -y+1, -$ 

z.

**Table S4** Hydrogen-Bond Geometry (Å, degree) for N–H···Br interactions in **2**.

| D–H···A       | H···A [Å] | D···A [Å] | D–H···A [°] |
|---------------|-----------|-----------|-------------|
| N1–H1C···Br3  | 2.72      | 3.41(8)   | 133.4       |
| N1'–H2C···Br3 | 2.74      | 3.62(9)   | 165.8       |
| N1'–H2D···Br3 | 2.97      | 3.72(8)   | 141.5       |

**Table S5** Selected bond lengths [Å] and angles [°] for **2** at 210 K.

|       |                           |           |                                         |           |
|-------|---------------------------|-----------|-----------------------------------------|-----------|
| 210 K | Pb1–Br2                   | 2.958(7)  | Pb1–Br3                                 | 3.051(10) |
|       | Pb1–Br1                   | 3.030(13) | Pb1–Br1 <sup>ii</sup>                   | 3.072(13) |
|       | Pb1–Br3 <sup>i</sup>      | 3.051(10) |                                         |           |
|       | Br2–Pb1–Br1               | 96.0(2)   | Br2–Pb1–Br1 <sup>ii</sup>               | 94.8(2)   |
|       | Br2–Pb1–Br3 <sup>i</sup>  | 84.91(13) | Br1–Pb1–Br1 <sup>ii</sup>               | 169.16(8) |
|       | Br1–Pb1–Br3 <sup>i</sup>  | 90.74(12) | Br3 <sup>i</sup> –Pb1–Br1 <sup>ii</sup> | 90.21(12) |
|       | Br2–Pb1–Br3               | 84.91(13) | Br3–Pb1–Br1 <sup>ii</sup>               | 90.22(12) |
|       | Br1–Pb1–Br3               | 90.74(12) | Br1–Pb1–Br1 <sup>iii</sup>              | 179.2(3)  |
|       | Br3 <sup>i</sup> –Pb1–Br3 | 169.8(3)  |                                         |           |

Symmetry code: (i)  $x, -y+1/2, z$ ; (ii)  $x+1/2, y, -z+1/2$ ; (iii)  $x-1/2, y, -z+1/2$ .

**Table S6** Hydrogen-Bond Geometry (Å, degree) for N–H···I interactions in **3**.

| D–H···A     | H···A [Å] | D···A [Å] | D–H···A [°] |
|-------------|-----------|-----------|-------------|
| N2–H2C···I1 | 3.28      | 4.04(3)   | 142.3       |
| N2–H2D···I3 | 3.27      | 3.95(3)   | 132.7       |
| N1–H1B···I4 | 3.30      | 3.95(3)   | 130.3       |

**Table S7** Selected bond lengths [Å] and angles [°] for **3** at 150 K.

|       |                                      |           |                                        |           |
|-------|--------------------------------------|-----------|----------------------------------------|-----------|
| 150 K | Pb1-I4                               | 3.063(3)  | Pb2-I2                                 | 3.084(3)  |
|       | Pb1-I3                               | 3.098(3)  | Pb2-I5                                 | 3.157(3)  |
|       | Pb1-I1                               | 3.183(2)  | Pb2-I6                                 | 3.208(2)  |
|       | Pb1-I1 <sup>i</sup>                  | 3.290(2)  | Pb2-I5 <sup>ii</sup>                   | 3.295(3)  |
|       | Pb1-I3 <sup>i</sup>                  | 3.416(3)  | Pb2-I6 <sup>ii</sup>                   | 3.302(2)  |
|       | I4-Pb1-I3                            | 86.48(7)  | I5-Pb2-I6                              | 85.93(7)  |
|       | I4-Pb1-I1                            | 91.41(7)  | I2-Pb2-I5 <sup>ii</sup>                | 87.47(7)  |
|       | I3-Pb1-I1                            | 87.52(6)  | I5-Pb2-I5 <sup>ii</sup>                | 176.64(8) |
|       | I4-Pb1-I1 <sup>i</sup>               | 85.47(6)  | I6-Pb2-I5 <sup>ii</sup>                | 96.20(6)  |
|       | I3-Pb1-I1 <sup>i</sup>               | 93.84(6)  | I2-Pb2-I6 <sup>ii</sup>                | 85.88(7)  |
|       | I1-Pb1-I1 <sup>i</sup>               | 176.51(6) | I5-Pb2-I6 <sup>ii</sup>                | 95.54(6)  |
|       | I4-Pb1-I3 <sup>i</sup>               | 86.98(7)  | I6-Pb2-I6 <sup>ii</sup>                | 177.54(8) |
|       | I3-Pb1-I3 <sup>i</sup>               | 171.82(7) | I5 <sup>ii</sup> -Pb2-I6 <sup>ii</sup> | 82.23(6)  |
|       | I1-Pb1-I3 <sup>i</sup>               | 97.57(6)  | Pb1-I1- Pb1 <sup>iii</sup>             | 79.44(5)  |
|       | I1 <sup>i</sup> -Pb1-I3 <sup>i</sup> | 80.73(6)  | Pb1-I3- Pb1 <sup>iii</sup>             | 78.70(5)  |
|       | I2-Pb2-I5                            | 89.86(7)  | Pb2-I5- Pb2 <sup>iv</sup>              | 79.73(5)  |
|       | I2-Pb2-I6                            | 92.16(7)  | Pb2-I6- Pb2 <sup>iv</sup>              | 78.89(4)  |

Symmetry code: (i)  $-x+2, y-1/2, -z+3/2$ ; (ii)  $-x+1, y+1/2, -z+3/2$ ; (iii)  $-x+2, y+1/2, -z+3/2$ ; (iv)  $-x+1, y-1/2, -z+3/2$ .
